# Supplementary material for: Pressure induced superconductivity bordering a charge-density-wave state in NbTe4 with strong spin-orbit coupling
Source: PubMed Central journal article supplement (PMC5908920; doi:10.1038/s41598-018-24572-z), 2018-04-19
Supplement: 41598_2018_24572_MOESM1_ESM.pdf [file 41598_2018_24572_MOESM1_ESM.pdf]

# Supporting Materials for ”Pressure induced superconductivity bordering a charge-density-wave state in NbTe<sub>4</sub> with strong spin-orbit coupling”

Xiaojun Yang<sup>1,2</sup>, Yonghui Zhou<sup>3</sup>, Mengmeng Wang<sup>1</sup>, Hua Bai<sup>1</sup>, Xuliang Chen<sup>3</sup>,  
Chao An<sup>3</sup>, Ying Zhou<sup>3</sup>, Qian Chen<sup>1</sup>, Yupeng Li<sup>1</sup>, Zhen Wang<sup>1</sup>, Jian Chen<sup>1</sup>,  
Chao Cao<sup>4</sup>, Yuke Li<sup>4</sup>, Yi Zhou<sup>1,6</sup>, Zhaorong Yang<sup>3\*</sup> and Zhu-An Xu<sup>1,5,6†</sup>

<sup>1</sup> *State Key Laboratory of Silicon Materials and Department of Physics,  
Zhejiang University, Hangzhou 310027, China.*

<sup>2</sup> *School of Physics and Optoelectronics,  
Xiangtan University, Xiangtan 411105, China*

<sup>3</sup> *Anhui Province Key Laboratory of Condensed Matter Physics at Extreme Conditions,  
High Magnetic Field Laboratory, Chinese Academy of Science, Hefei 230031, China*

<sup>4</sup> *Department of Physics, Hangzhou Normal University, Hangzhou 310036, China*

<sup>5</sup> *Zhejiang California International NanoSystems Institute,  
Zhejiang University, Hangzhou 310058, China*

<sup>6</sup> *Collaborative Innovation Centre of Advanced  
Microstructures, Nanjing 210093, P. R. China*

(Dated: April 11, 2018)

---

\* Electronic address: zryang@issp.ac.cn

† Electronic address: zhuan@zju.edu.cn

The field dependences of  $\rho_{xx}$  and  $\rho_{yx}$  are fit by the following equations:

$$\rho_{xx}(B) = \frac{1}{e} \frac{(n_h \mu_h + n_e \mu_e) + (n_h \mu_e + n_e \mu_h) \mu_h \mu_e B^2}{(n_h \mu_h + n_e \mu_e)^2 + (n_h - n_e)^2 \mu_h^2 \mu_e^2 B^2} \quad (1)$$

$$\rho_{yx}(B) = \frac{B}{e} \frac{(n_h \mu_h^2 - n_e \mu_e^2) + (n_h - n_e) \mu_h^2 \mu_e^2 B^2}{(n_h \mu_h + n_e \mu_e)^2 + (n_h - n_e)^2 \mu_h^2 \mu_e^2 B^2} \quad (2)$$

where  $n_e$ ,  $n_h$ ,  $\mu_e$  and  $\mu_h$  are the carrier densities and mobilities of electrons and holes, respectively. Simultaneously fitting our ambient pressure data with the above equations in the low field region ( $B \leq 1$  T), we can get the temperature dependences of  $n_e$ ,  $n_h$ ,  $\mu_e$  and  $\mu_h$ . The fitted curves are displayed as lines in Fig. S1(a) and S1(b) and they agree well with the experimental data in the field region of 0 T - 1 T.

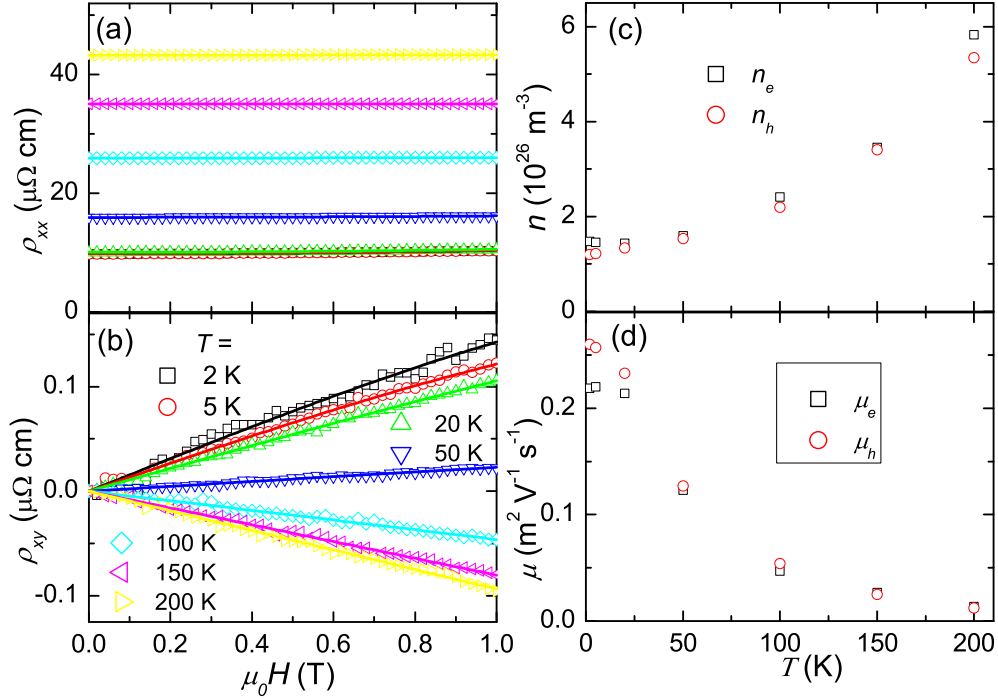

FIG. S 1: Two band model fitting of low field transport properties of NbTe<sub>4</sub> single crystal with  $\mathbf{I}/\mathbf{c}$ -axis and  $\mathbf{B}/\mathbf{b}$ -axis. Field dependence of (a), transverse magnetoresistivity  $\rho_{xx}$  and (b), Hall resistivity  $\rho_{yx}$ . The symbols correspond to experimental data, while the lines are the fitting curves by the two-band model. (c) and (d) display the temperature dependence of carrier density and mobility, respectively.
